# Supplementary material for: Pax7 pioneer factor action requires both paired and homeo DNA binding domains
Source: PubMed Central journal article supplement — Nucleic Acids Res. 2021 Jul 1;49(13):7424–36. doi: 10.1093/nar/gkab561 (PMC8287922; doi:10.1093/nar/gkab561), 2021-07-01
Supplement: gkab561_supplemental_file.pdf [file gkab561_supplemental_file.pdf]

## Legends to Supplementary Figures

**Supplementary Figure 1.** Characterization of Pax7 EMSA complexes with various probes. A) DNA sequences of probes used in gel retardation assays (EMSA). B,C) Competitive EMSA assays to assess relative affinities of composite HP.E0, PD and H.I2 targets. Complexes formed between the HP.E0 probe and Pax7 from AtT20Pax7 nuclear extracts were competed with the indicated molar excesses of either HP.E0, PD or H.I2 probes. Displacement curves (means  $\pm$ SD, n=4) for quantitated band intensities (Image Lab, BioRad) were computed with GraphPad Prism. D) EMSA supershift experiments using the Flag2 antibody to supershift Flag-Pax7-containing DNA complexes.

**Supplementary Figure 2.** Nucleosome positioning relative to Pax7 Pioneer sites was determined by MnaseSeq analyses in AtT20neo and AtT20Pax7 cells. The MnaseSeq heatmaps (right) are sorted according to central read densities ( $\pm$ 100 bp) and centered ( $\pm$  1000bp) on the by Pax7 peak summit for each subset of sites. For comparison (left), the Pax7 ChIPseq and ATACseq profiles centered on Pax7 binding are shown (data from ref. 4). Only the Pioneered subset of sites shows a different pattern in AtT-Pax7 cells compared to the Neo control, revealing recruitment to nucleosome-occupied sites and nucleosome depletion after Pax7 binding.

**Supplementary Figure 3.** Characterization of Pax7 mutants within the PD (G43A and R56L) and HD (S264E) domains. A) Western blot analysis for expression of Pax7 and three mutants in AtT20 cells expressing N-terminally flagged Pax7 proteins. PCNA Western blot is used as loading control. B) EMSA using the indicated DNA probes incubated with nuclear extracts from AtT20 cells expressing the indicated Pax7 and mutants. C) Transcriptional activity of Pax7 and its DBD mutants assessed by cotransfection of indicated expression plasmids together with a luciferase reporter plasmid driven by six copies of the HP.E0 composite or by the PC2 gene enhancer. Luciferase activity was assessed as previously (5) in extracts of AtT20 cells prepared 48 hours post-transfection with PEI25K. D) Genomic recruitment (Flag-Pax7 ChIPseq) and ATACseq profiles at the Pax7 Pioneered sites compared to the same sites in AtT20 cells expressing the three Pax7 DBD mutants.

**Supplementary Figure 4.** Alignment of mouse Pax7, human PAX3 and human PAX6 sequences showing structural features of PD (green) and HD (blue) DNA binding domains. Sequences (Accession numbers P47239.2, P23760.2, P26367.2) were aligned using NCBI Blast 2. Amino acids legend: Black = all different ; Blue = 2/3 identical ; Red = 3/3 identical, Upper case = corresponding in number ; lower case = specific to one protein. The numbering used in indicated previous publications is shown together with positions in mouse Pax7 used in present work.

**Supplementary Figure 5.** Representative loci for genomic recruitment (Flag-Pax7 ChIPseq) and ATACseq for wildtype Pax7 and three DBD mutants as indicated. Two representative loci are shown for each subset of peaks in the Constitutive, Activated and Pioneered categories. Examples are shown for peaks containing multiple motifs (A), or only one Composite (B), PD (C) or HD (D) motif.

**Supplementary Figure 6.** Pax7 target genes. A) Time courses of mRNA accumulation determined by RNAseq analyses (5) showing rapid responses for genes regulated through “Pax7 Activated” enhancers compared to the slower responses of “Pioneered” target genes. B) A unique example, the *Oacyl* gene, of Pax7 pioneer action at promoter rather than enhancer sequences. Gene browser views of the *Oacyl* locus show the indicated ChIPseq and ATACseq analyses performed in AtT20Neo, AtT20Pax7 WT or mutant cells.

A

| Probe sequences |                                                  |
|-----------------|--------------------------------------------------|
| Composite HP.E0 | TCGACGCAGAT <u>CCGTGACTAAT</u> GTTCCGACCTCGA     |
| PD (mutated HD) | TCGACGCAGAT <u>CCGTGAC</u> GCCAGTTCGACCTCGA      |
| HD (mutated PD) | TCGACGCAGATCGTCCGCT <u>TAAT</u> TCCAACGACCTCGA   |
| H.I-2           | TCGACCAGATCGTCCGCT <u>TAATTA</u> CCAACGACCTCGA   |
| H.I2            | TCGACTCGTCCGCT <u>TAATTGATTAT</u> TCCAACGACCTCGA |

B

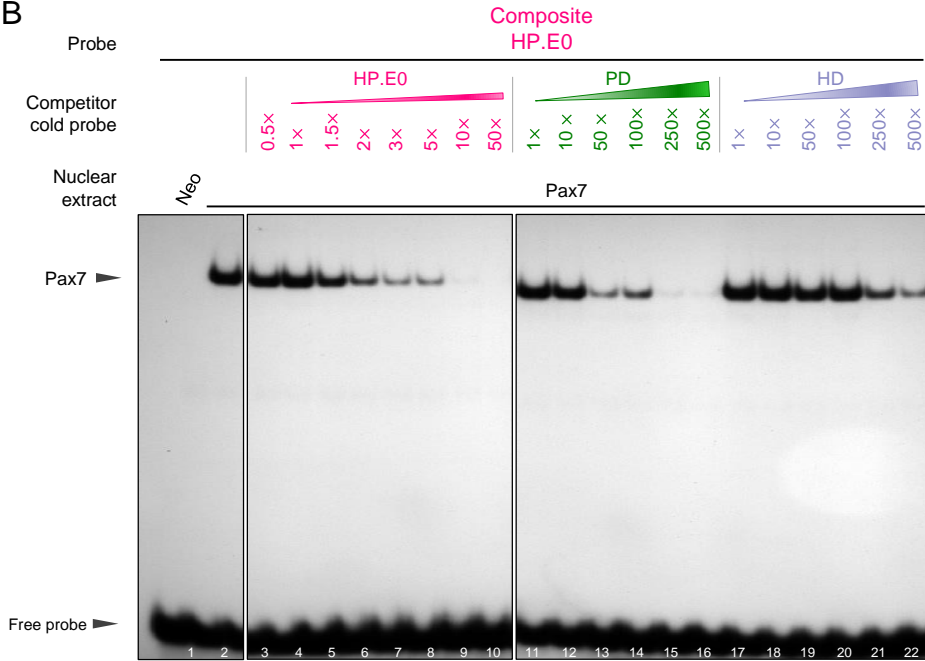

C

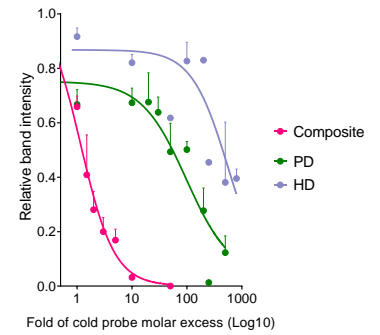

D

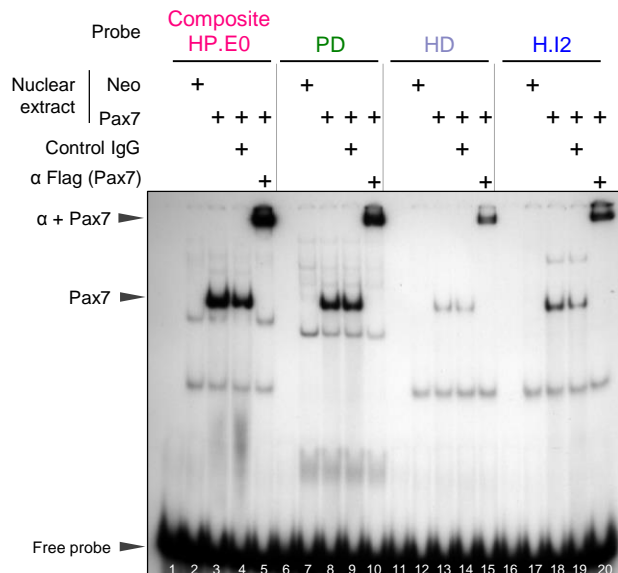

A

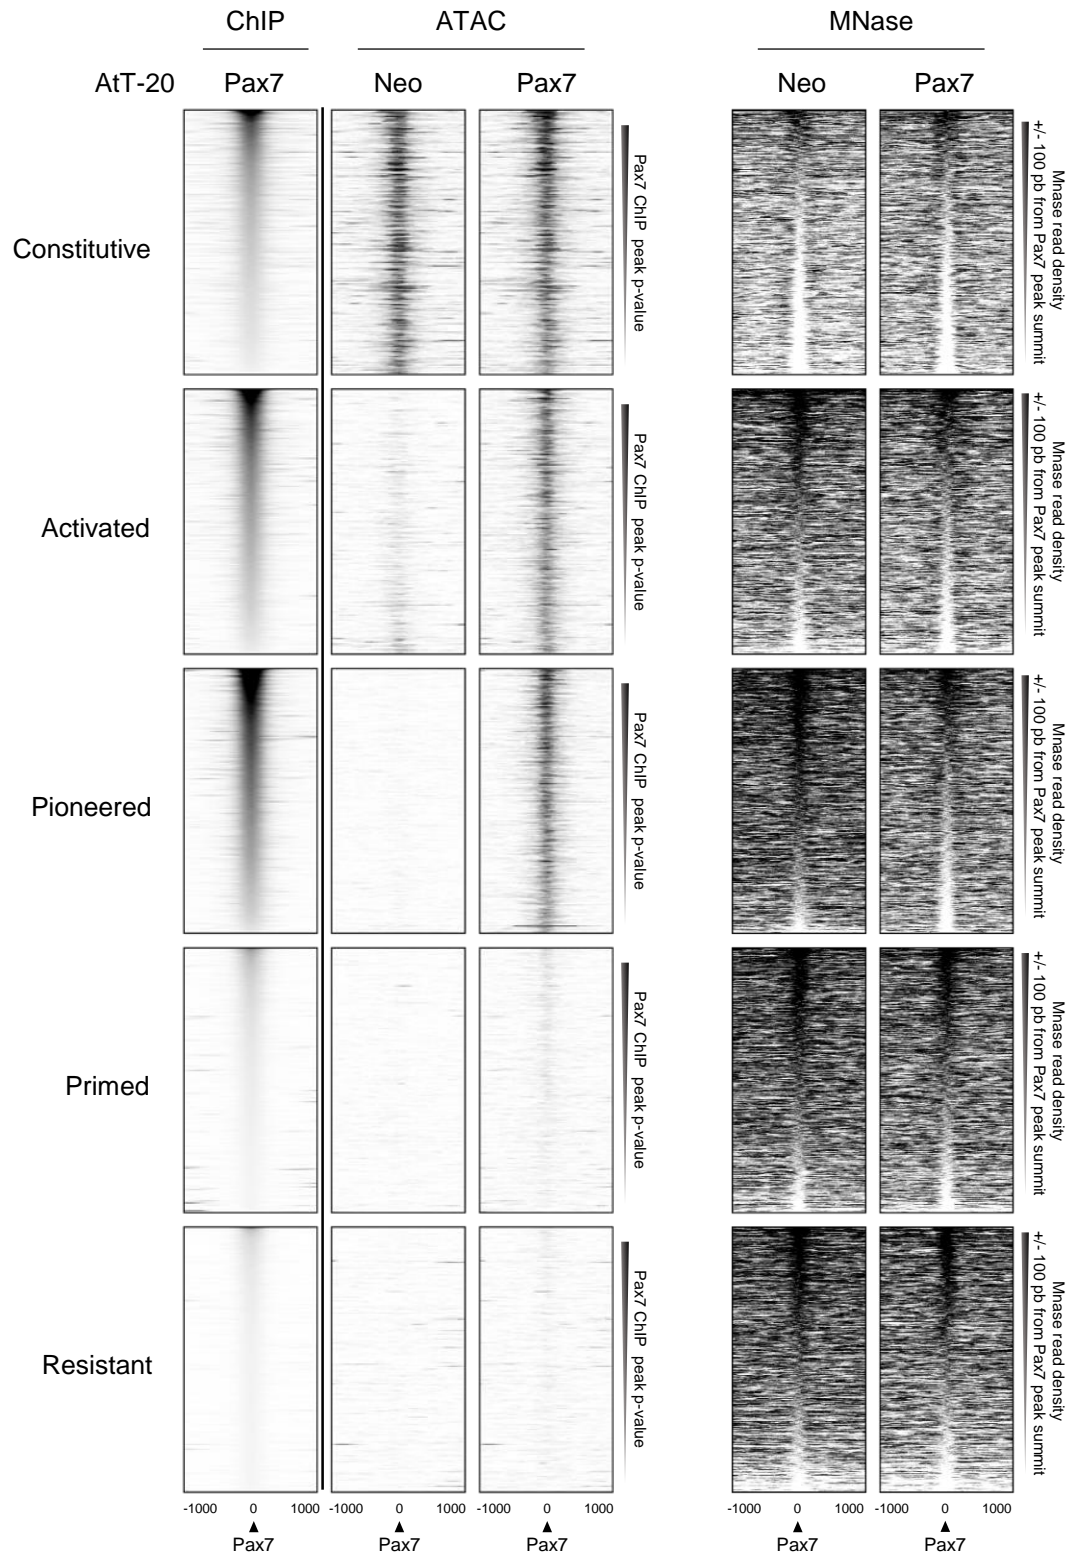

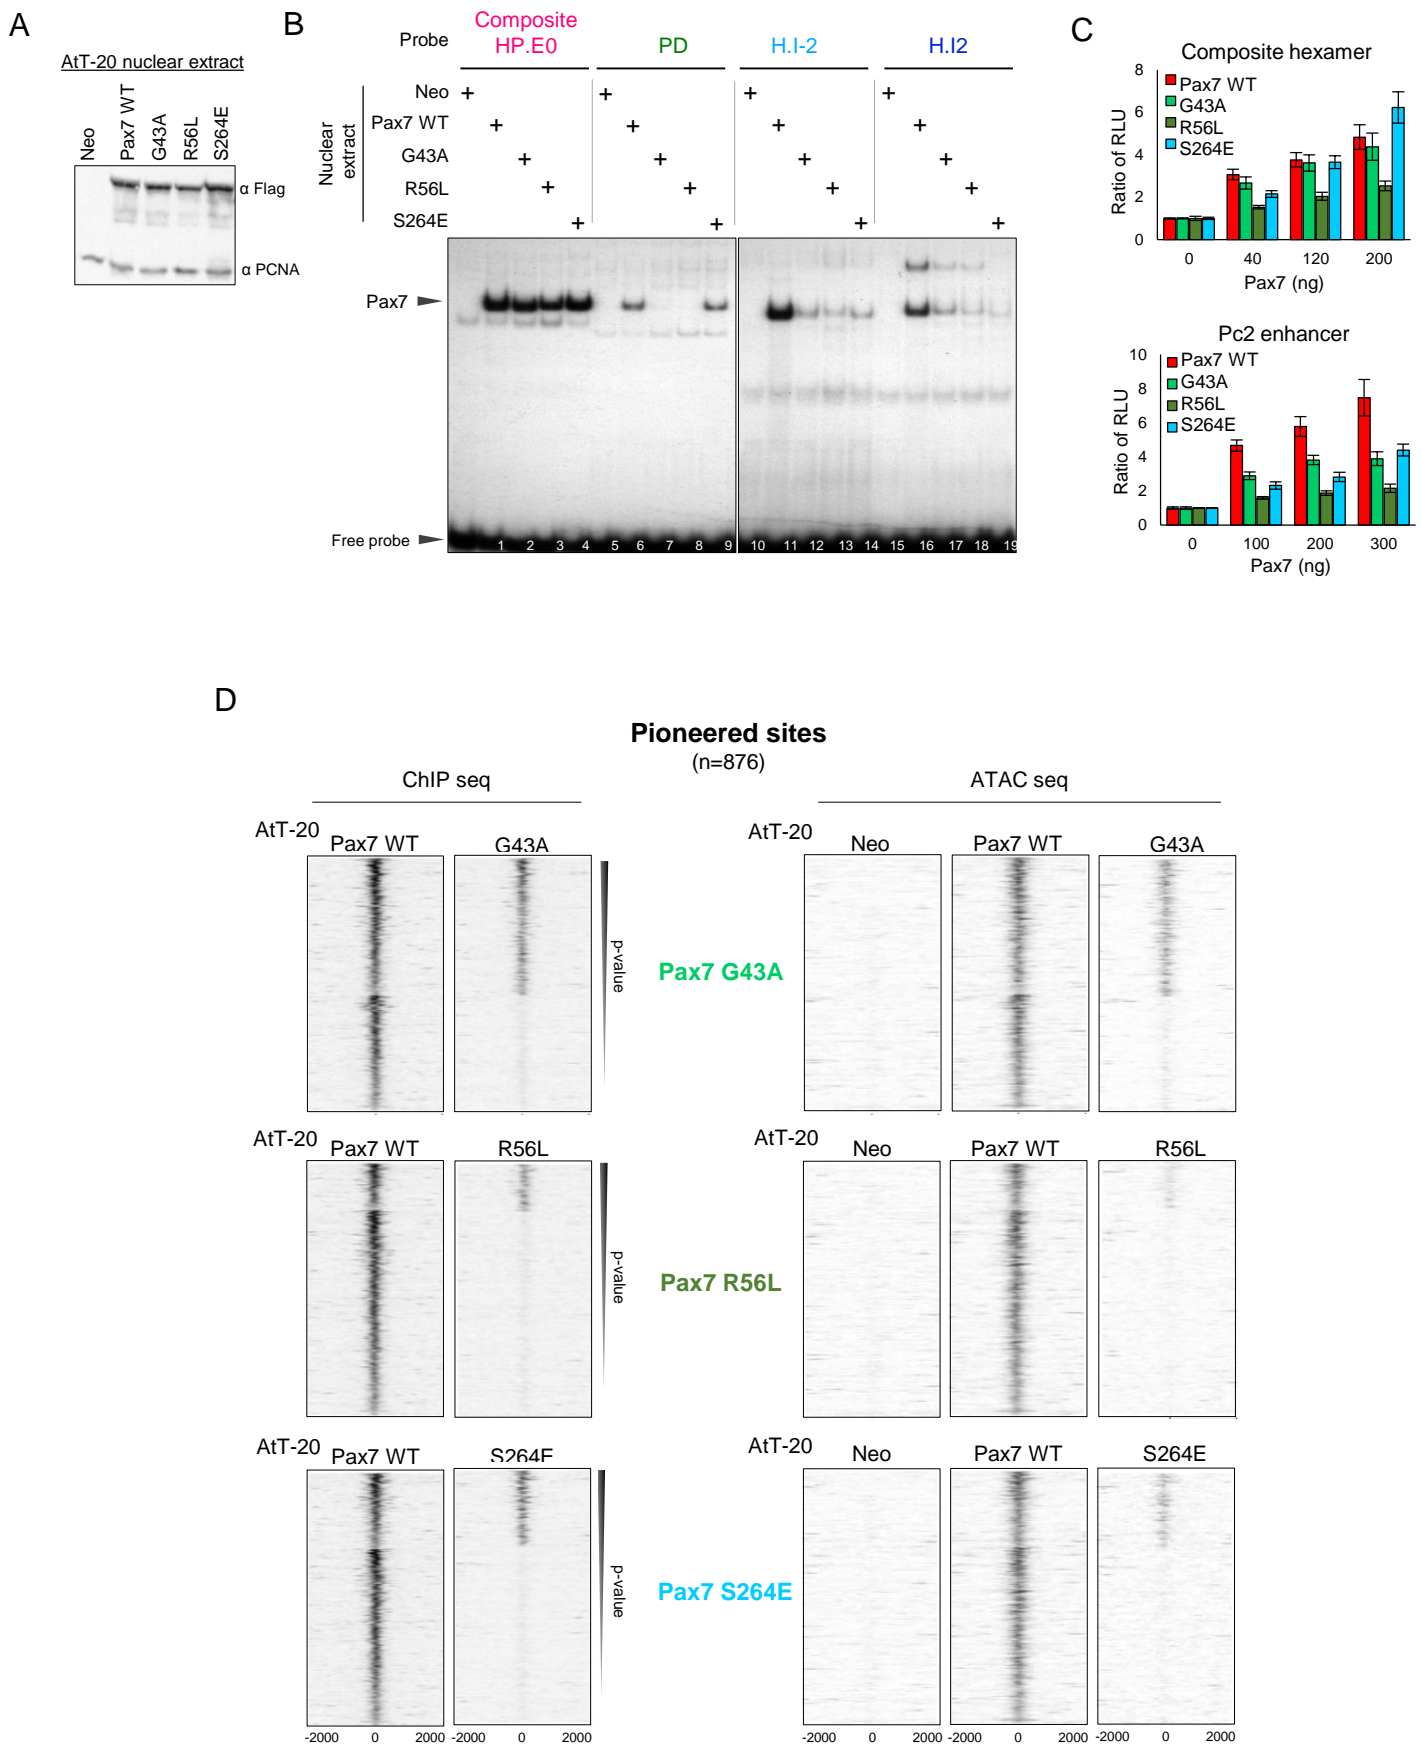

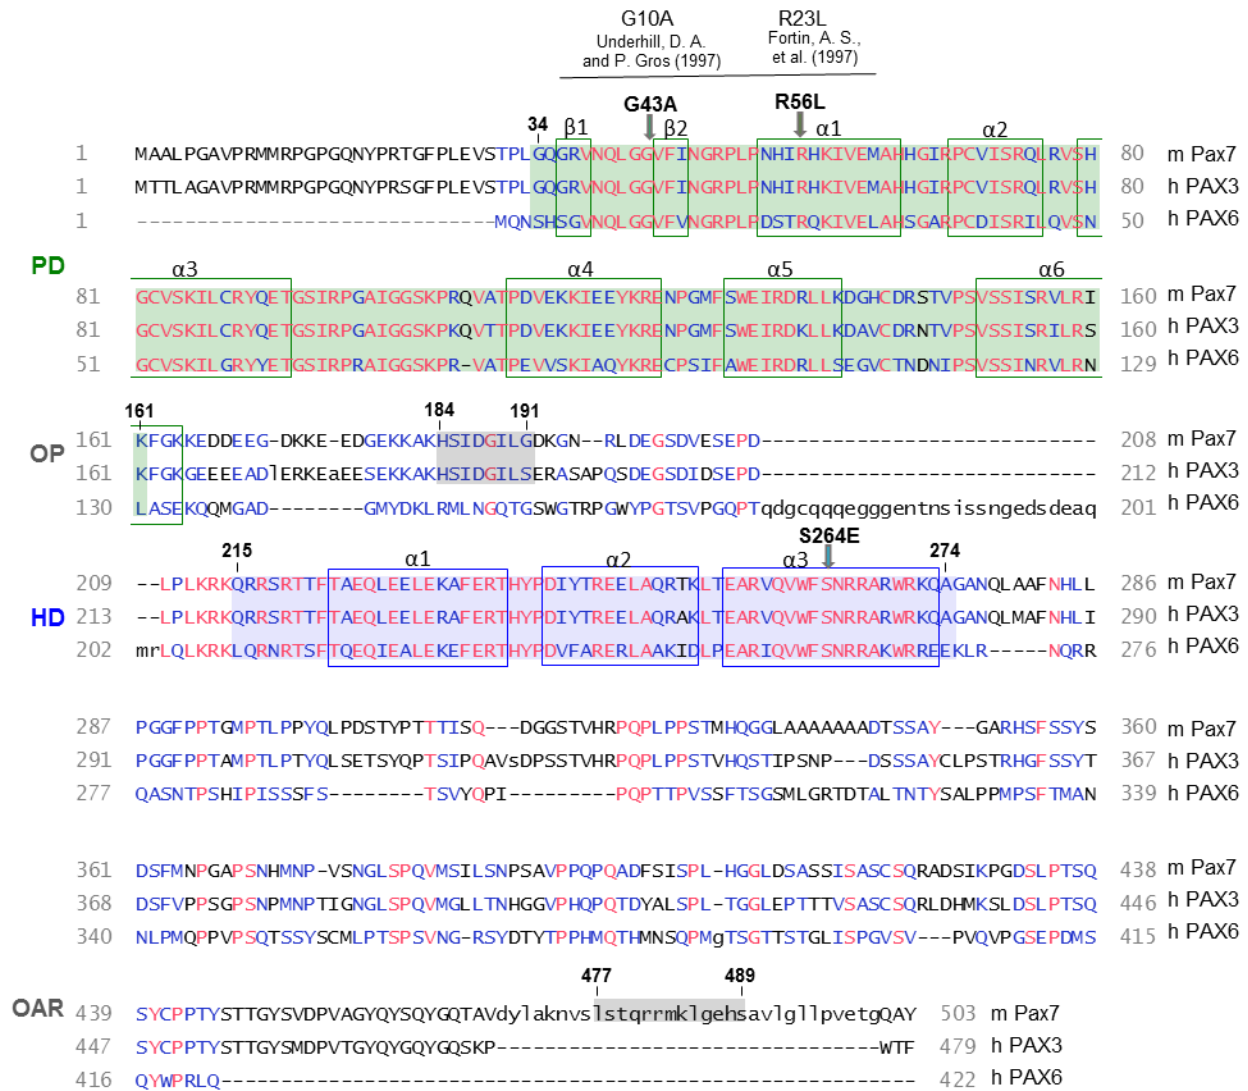



A

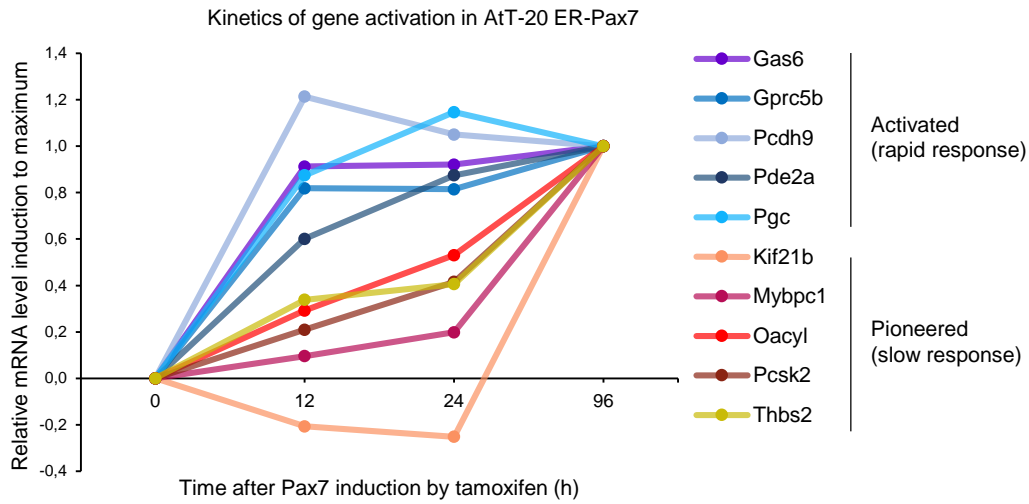

B

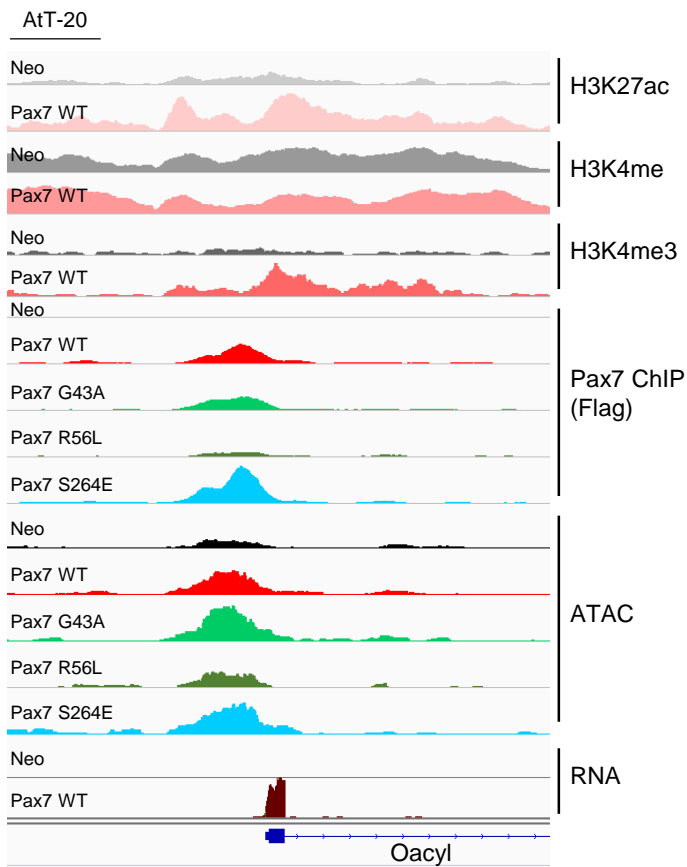

Supplementary Table 1. Sequences of oligonucleotide primers

| Gene symbol | Sequence accession number | Amplicon length | Primer sequence       | Location   |
|-------------|---------------------------|-----------------|-----------------------|------------|
| Gapdh       | NM_008084.3               | 110             | TGCAGTGGCAAAGTGGAGAT  | Exon 2     |
|             |                           |                 | ACTGTGCCGTTGAATTTGCC  | Exon 2     |
| Gas6        | NM_019521.2               | 107             | GCCTCTATCACCTGAATCT   | Exon 11    |
|             |                           |                 | CCAGTTCCAACCTCCTCAT   | Exon 12    |
| Gprc5       | NM_022420.2               | 122             | CACCGTTCAGAAGCAATG    | Exon 3     |
|             |                           |                 | GGAACCTTAAGGTCTTTCACC | Exon 4     |
| Pcdh9       | NM_001081377.3            | 150             | CAGCCACAGGACGAATTCTAC | Exon 4     |
|             |                           |                 | ACCCAAAACCAGACACTCTTG | Exon 5     |
| Pde2a       | NM_001143848.2            | 161             | GAGAACCAGGAGGTCATT    | Exon 18-19 |
|             |                           |                 | CGGTATTGGGCTTCATTC    | Exon 20    |
| Pgc         | NM_025973.3               | 168             | TGCCCAGTACCTGAATGA    | Exon 7     |
|             |                           |                 | CCTTCCTCCTGGATGATGTA  | Exon 8-9   |
| Kif21b      | NM_001039472.2            | 161             | AGAACCAGTCTCGCTATG    | Exon 15    |
|             |                           |                 | CTTCTTGAGCTGAGCAATC   | Exon 16    |
| Mybpc1      | NM_175418.5               | 200             | ACGAGGTCCGAATCTTTG    | Exon 19    |
|             |                           |                 | ATACTCTAGCACATAGCCATC | Exon 20    |
| Oacyl       | NM_177028.3               | 181             | GTCCAGATATGTTTGCTTCC  | Exon 4     |
|             |                           |                 | CTGTTGCTCTCCATGTTTC   | Exon 5     |
| Pcsk2       | NM_008792.4               | 123             | TGACAAGTGGCCTTTCAT    | Exon 12    |
|             |                           |                 | ATCAGGGTCCATTCTTC     | Exon 12    |
| Thbs2       | NM_011581.3               | 183             | CACTCAAAGTGGTAAACTCC  | Exon 19    |
|             |                           |                 | CTCTCATGTAGCCTGTCTTA  | Exon 20-21 |



Supplementary Table 2. Summary of high throughput sequencing datasets and experimental conditions

| Experiment | Cell line         | Number of cells | Sequencing depth (read number) | Matching control for peak calling | Antibody reference | Antibody quantity ( $\mu\text{g}$ ) | Replicate number |
|------------|-------------------|-----------------|--------------------------------|-----------------------------------|--------------------|-------------------------------------|------------------|
| ATAC-seq   | AtT-20 Neo        | 1,00E+05        | 95251912                       | Input AtT Pax7                    | N/A                | N/A                                 | 2                |
| ATAC-seq   | AtT-20 Pax7       | 1,00E+05        | 82583056                       | Input AtT Pax7                    | N/A                | N/A                                 | 2                |
| ATAC-seq   | AtT-20 Pax7 G43A  | 1,00E+05        | 32502682                       | Input AtT Pax7                    | N/A                | N/A                                 | 1                |
| ATAC-seq   | AtT-20 Pax7 R56L  | 1,00E+05        | 31497109                       | Input AtT Pax7                    | N/A                | N/A                                 | 1                |
| ATAC-seq   | AtT-20 Pax7 S264E | 1,00E+05        | 26377490                       | Input AtT Pax7                    | N/A                | N/A                                 | 1                |
| ChIP-seq   | AtT-20 Pax7       | 1,00E+07        | 77949054                       | AtT-20 Neo                        | Flag M2 Sigma      | 6                                   | 1                |
| ChIP-seq   | AtT-20 Pax7 G43A  | 1,00E+07        | 94880640                       | AtT-20 Neo                        | Flag M2 Sigma      | 6                                   | 1                |
| ChIP-seq   | AtT-20 Pax7 R56L  | 1,00E+07        | 72825980                       | AtT-20 Neo                        | Flag M2 Sigma      | 6                                   | 1                |
| ChIP-seq   | AtT-20 Pax7 S264E | 1,00E+07        | 102208451                      | AtT-20 Neo                        | Flag M2 Sigma      | 6                                   | 1                |
| MNase-seq  | AtT-20 Neo        | 3,00E+06        | 220458865                      | N/A                               | N/A                | N/A                                 | 2                |
| MNase-seq  | AtT-20 Pax7       | 3,00E+06        | 229205088                      | N/A                               | N/A                | N/A                                 | 2                |
